# Supplementary material
Source: PubMed Central journal article supplement (PMC6740407)
Supplement: ao9b02204_si_001.pdf [file ao9b02204_si_001.pdf]

## Supporting Information

# Aqueous Phase Synthesis of $\text{Cu}_{2-x}\text{S}$ Nanostructures and their Photothermal Generation Study

*Zhourui Xu, <sup>†</sup> Nanxi Rao, <sup>†</sup> Chak-Yin Tang, <sup>†</sup> Ching-Hsiang Cheng <sup>†‡</sup> and Wing-Cheung Law\* <sup>†</sup>*

<sup>†</sup> Department of Industrial and Systems Engineering, The Hong Kong Polytechnic University, Hung Hom, Kowloon, Hong Kong SAR, P. R. China.

<sup>‡</sup> School of Automotive Engineering, Wuhan University of Technology, Hubei, 430070, P. R. China

Email: [roy.law@polyu.edu.hk](mailto:roy.law@polyu.edu.hk)

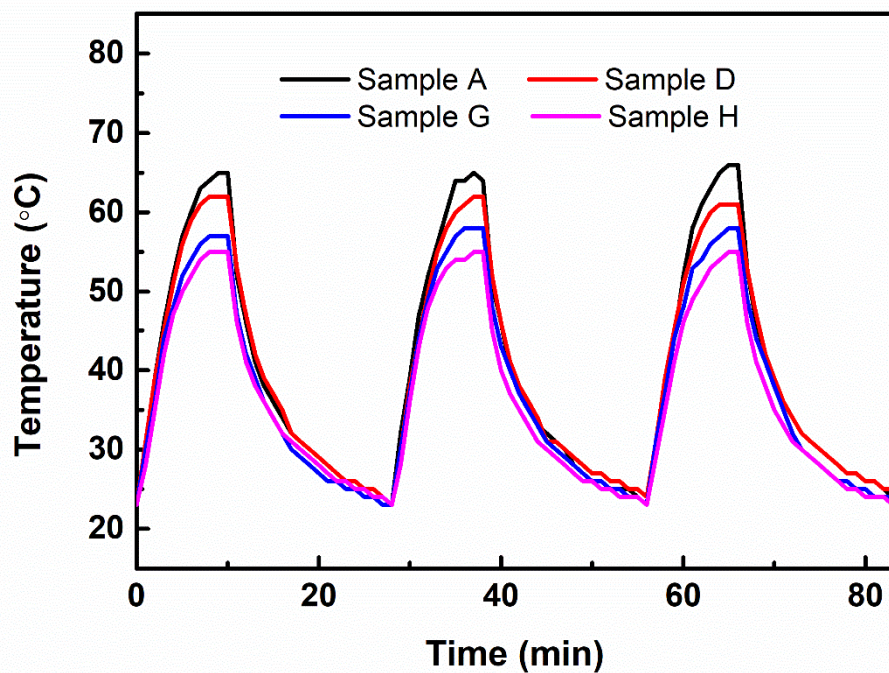

Figure S1. The photothermal stability test of  $\text{Cu}_{2-x}\text{S}$  nanostructures over three cycles. Sample A denoted as  $\text{Cu}_9\text{S}_8$  dots; Sample D denoted as the mixture of  $\text{Cu}_9\text{S}_8$  dots and short rods; Sample G denoted as CuS nanorods with length of 36 nm; Sample H denoted as CuS nanorods with length of 44.5 nm.
